# Supplementary material
Source: PubMed Central journal article supplement (PMC2722232)
Supplement: ddn443_1.pdf [file ddn443_1.pdf]

*MEIS1* Intronic Risk Haplotype Associated with Restless Legs Syndrome Affects mRNA and Protein Expression  
Levels

Lan Xiong, Helene Catoire, Patrick Dion, Claudia Gaspar, Ronald G. Lafrenière, Simon L. Girard, Anastasia Levchenko, Jean-Baptiste Rivière, Laura Fiori, Judith St-Onge, Isabelle Bachand, Pascale Thibodeau, Richard Allen, Christopher Earley, Gustavo Turecki, Jacques Montplaisir, Guy A. Rouleau

**Supplementary data**

**Supplementary Table S1. Primer List for All PCR Amplifications**

| Region                  | Fragment                     | Forward_Primer                | Reverse_Primer                 | Amplicon length | Opt. T' |
|-------------------------|------------------------------|-------------------------------|--------------------------------|-----------------|---------|
| <b>Long-range PCR</b>   | <b>LRP01</b>                 | GCAGGCCTACGATTGGTATTTCGGAGATC | TCATATTCTGTGCACAGAGCCAGTCTA    | 6861            | 57      |
|                         | <b>LRP02</b>                 | TTGGGAGACGAAGAGGGTCAGTTCAGAG  | AAGCAGGAGCCAGATCACCCCCTCAGT    | 6986            | 59      |
|                         | <b>LRP03</b>                 | ACCCAGCAGTGTAATTTCCCTCCAGAT   | ACCTCCCTCCCTTATCCCTAACTTCAG    | 6858            | 55      |
|                         | <b>LRP04</b>                 | CATGGAGCTCCCGTGCTTCCAGGAATAC  | TCATTTGCAGACATTCTTTCCCTCGTT    | 6919            | 58      |
|                         | <b>LRP05</b>                 | TACATATACCTCAGTGCAGCAGTACTG   | ATCAGTCCCTTTTACTTTGATCTTCAA    | 6927            | 55      |
|                         | <b>LRP06</b>                 | ACTTAGGCAATAGAGACCTTTGAAGATC  | CATTTTCCACCCACTTAGCTGCTGTFTA   | 6838            | 55      |
|                         | <b>LRP07</b>                 | CCAGCTAAGGTTATAAACAGCAGCTAAG  | AGCATTAAACCTGCACATGTGTATTAGG   | 6845            | 55      |
|                         | <b>LRP08</b>                 | TCTCTGCAGCCAAACCAGCCTAATACA   | ACTTGAGGGACATTTTCTACAGCAAACA   | 6853            | 55      |
|                         | <b>LRP09</b>                 | TTGCTGTAGAAAATGTCCCTCAAGTAAC  | TAATTAGCCCTGAGCCTCATCTGTCGTA   | 6870            | 55      |
|                         | <b>LRP10</b>                 | GAGGGAATTTATGCATCATAACAGAGAT  | AATTATTTGGGGTCATGATGGACATCTA   | 6852            | 55      |
|                         | <b>LRP11</b>                 | TCTGGGATAATGATAAAATACACTAAAG  | ACACTGTCCACCTTATAATGATTTTGAG   | 6879            | 53      |
|                         | <b>LRP12</b>                 | CCATGCAGAAGACAAGAGGCCCCCTCAA  | ACGTGTTTAGAAAACAAGGCCCATCAGC   | 2992            | 57      |
| <b>Conserved region</b> | <b>C01</b>                   | ATAAATGGCATTAAAAGCGGGGAGGTAA  | TGTTTGCCATATTCAGTTTTTCTTGGTA   | 394             | 53      |
|                         | <b>C02.A</b>                 | TATTGTTGGCCACACTTTAGGATTTTAT  | GATTGCTTTATTCCTTTATTGAAGTTCA   | 607             | 52      |
|                         | <b>C02.B</b>                 | TTGGCTTTATTGACTTTCATGGGAGTTG  | TATAACACCCTAAAATGGCCACCATGTC   | 685             | 55      |
|                         | <b>C03</b>                   | GACATGGTGGCCATTTTAGGGTGTATA   | ATTGTGGGGGCATAGAGATGGTTCCTAT   | 720             | 56      |
|                         | <b>C04</b>                   | GGAACCATCTCTATGCCCCACAATAGG   | CAGGGAAGAGGGACCCAAATCAACTGTC   | 640             | 58      |
|                         | <b>C05</b>                   | GTAAGTGTACCTTTGCACTTGAAAGT    | AATTAAGAATTGTCCGTTGGAGTTTGTGTC | 571             | 51      |
|                         | <b>C06</b>                   | TGGCCCACTGACACAGGAAGTTCTGATC  | GCACAGGCTCGGGCATTATAAGACTCTA   | 882             | 58      |
|                         | <b>C07.A</b>                 | AGAGCCCAGGAAGTTCAGGGAGAGGAT   | ACCCTGCTCCTTTCCGACACAAGTTAGG   | 825             | 59      |
|                         | <b>C07.B</b>                 | GGCCGGCGGTTCTCCAAGTTTGTAGT    | CAAGCAATGCATAGTGCCTGCCTAGAAG   | 926             | 57      |
|                         | <b>C07.C</b>                 | ATCTGGCTCCTGCTTGAAAGGTTTCTCC  | TTCTCTGACTGGGCCAAGGTCATGTACC   | 826             | 57      |
| <b>C08</b>              | CTTTGGAAGAAGTTCTTTAGACCTGACT | TTGGGGTATCTATCTAAGAAATAAGTGC  | 530                            | 53              |         |
| <b>C09</b>              | TAAGAAGAAAGTTAGACAAACCCTAGAG | CTATGTAACCTTGCTACAACCTGTCTAA  | 610                            | 52              |         |

| Region | Fragment     | Forward_Primer               | Reverse_Primer                | Amplicon length | Opt. T' |
|--------|--------------|------------------------------|-------------------------------|-----------------|---------|
|        | <b>C10</b>   | TTTGGTTAAGCCTTACTACAGGGACAAA | CTACTACCTGCCCATGTGCCTACCTGTA  | 585             | 55      |
|        | <b>C11</b>   | GTCTGGGGAGGGAAATGGAGTCGATTAT | ACCCAGGTCAGAGGTGCATAACTACAA   | 433             | 57      |
|        | <b>C12</b>   | GGGGTGAAGAATCTTTCCTCATGCAGAT | CCAACGGAAAGATCATTAATCAAGTTCG  | 826             | 56      |
|        | <b>C13.A</b> | GTTCTATTGTGGCAGCTCCATTGAGACA | GACATTCTTCCCCTCGTTTTTGGTAAA   | 755             | 57      |
|        | <b>C13.B</b> | TGTAATAATTAAGCTGGGAGGCAGAATC | TCACCTCCAACACTACAGCGTTATGAAGA | 651             | 54      |
|        | <b>C14</b>   | TGTATTCCCACTGCCTTGTGTACTTTAT | GTAGTCTACAATGCCATCAGAGGTCTGT  | 596             | 55      |
|        | <b>C15</b>   | ACATACATATAGCTACCCCTCTTAATA  | AGATGGCTGTTAGATCTTTAACCTTTTC  | 493             | 52      |
|        | <b>C16</b>   | AAATAAAGGGCTCAGTAGTCCTCAAAC  | TGAGAGCCATACCTACCAAACCTAGTA   | 485             | 56      |
|        | <b>C17</b>   | CTAGTTATAACCAGTTTTAGTGGGTA   | TTTTGTTAAAGGAGAGCCAGATAAATAT  | 865             | 52      |
|        | <b>C18</b>   | CTTTAGTTTGATTGCAAGATAAGAGTTT | CTGGGAAAATATTGTTTAGCTAGTTGAT  | 893             | 51      |
|        | <b>C19</b>   | GTGGGCATTTGTTTTCAAGCTGGTATC  | ATTGCCTTACAGATGCCCTGTCTAGCA   | 895             | 57      |
|        | <b>C20</b>   | TTGGTGGAGAATTAAGAAAGCGGATGGA | TTCCCCTCCTGCATTGACTGTGAATAGC  | 387             | 57      |
|        | <b>C21.A</b> | CTGCAAGTTTATTTAAAGTGGGAGAAGT | AACGGCTATAACAAAGCAATAGAGGTAG  | 543             | 53      |
|        | <b>C21.B</b> | TCCAACATATTCAGCCAAGCAACAGAAC | ACTGGGATGGGAGGGGATTTTAAGTTG   | 643             | 56      |
|        | <b>C22</b>   | ATGAGTTATCCCTTCGCTGGGGTTC    | AAGGCCTATGTCACTCCTTGCCATCCTC  | 628             | 58      |
|        | <b>C23</b>   | TATATATATATCCGAACAACCTGAA    | TACCTGGAGCTCAAAGGGTAGTA       | 826             | 53      |
|        | <b>C24</b>   | TGAAATTTTGAGAGCCATATTACTACCC | CACCACTGGCACTATGTGTCATATAAAG  | 484             | 52      |
|        | <b>C25</b>   | AGGCGTCTGCTACATCCTTTGGTCATGG | GCTTAGGGGAGGAGCTGAGGATATGGTT  | 640             | 56      |
|        | <b>C26</b>   | GGCAATATGGTGTTTTAGAGGGAGAACG | TTTCACTTTTGAATCAACAAGCCACCAG  | 668             | 56      |
|        | <b>C27.A</b> | TGTGCAATACTGTTTCTAAATAAAGTGT | CTGTTAATGTAGGTGCAATAGACATCAA  | 499             | 52      |
|        | <b>C27.B</b> | TGGGGAAACCTTATCCTCTTTGAAGTAA | CAGCCTTGAAAATTAAGACACAGTAGCA  | 620             | 55      |
|        | <b>C28</b>   | CAGGCGTGAGCTACTGCACCCACTTATA | GCCTTCTCCCCTCAAATCCCATGTACT   | 573             | 55      |
|        | <b>C29</b>   | TAGCAGCCAAGATGACACTGTTAGAAC  | TCCTAGGCAAGGAAAATCACCATACA    | 660             | 53      |
|        | <b>C30</b>   | TCAATGGAGTAACAGGTGCGGTATATTA | GTGGGGAAAAGCTCTGAGTAACTTATG   | 545             | 54      |
|        | <b>C31</b>   | TAAAGTGTGCGCTCTGAAACTCTCATT  | GTCCCCTTGATTCACATAGTGAGTTTCA  | 697             | 54      |

| Region                | Fragment       | Forward_Primer                | Reverse_Primer                | Amplicon length | Opt. T' |
|-----------------------|----------------|-------------------------------|-------------------------------|-----------------|---------|
|                       | <b>C32</b>     | ATGTGAATCAAGGGGACAAATGTCTCAG  | ACTGGAGCAATGCAGACCGGATCTAAGA  | 567             | 57      |
|                       | <b>C33</b>     | GTGGCTGATTGATGGACTTCTTATGATT  | CCCTCAGGGAAAGAGGTCTAGTTATCTC  | 482             | 54      |
|                       | <b>C34</b>     | TTTACTTATGCCTCTTAAAAATGACAGGA | TTAAAAACAACATCACCTTTTCGACCTTA | 478             | 53      |
|                       | <b>C35</b>     | AGACAGAATTCCTTCCCTCTAAGAGTCT  | AACCATTAAACAGACAGGGACAGGTTT   | 583             | 52      |
|                       | <b>C36</b>     | GACTTGTCACCTTTTGGAGAGGCTACAA  | CTCCGGGCATTAATAAACCTGTAACCAA  | 848             | 55      |
|                       | <b>C37</b>     | AGTCCCATTTTGCCAAGATCTAGTTTTA  | GAAGTATCGCCATTTTAAGTCATAATT   | 854             | 54      |
| <b>Predicted gene</b> | <b>PRD01.A</b> | TGGGATGGGGAGAGGTGACAAGAGTAGC  | GCATTCCTAACAAGCTCCCAGGGACTGC  | 769             | 60      |
|                       | <b>PRD01.B</b> | TACCCATGAGGTCACCTACTCAAAATGG  | TGTCCAGGTAGATTTCTTTGCAGACAAA  | 765             | 57      |
|                       | <b>PRD01.C</b> | TTTCAGAAACGATTGGATTTTCAGATAG  | GTACAATTCTGTTTCATCCGACCACATC  | 628             | 56      |
|                       | <b>PRD02</b>   | AGCGCCTGGCACATTCTCACTTCTGAT   | TTGGTGAACCCCTGAGTAAGGGCTGTG   | 497             | 60      |
|                       | <b>PRD03</b>   | TTTTCTGTGGTTTACCAAGTTGGCTGTG  | CCTGGTCTCTTCCCCAAAACTGAATTG   | 378             | 55      |
|                       | <b>PRD04</b>   | CAGGGACTTCATATACAAGAACTGATAT  | CCTAATTCTATTTTAATGCCACTATTA   | 889             | 52      |
| <b>Exon</b>           | <b>E01</b>     | GACTGATTCAAGGGAAGCGAGCG       | CGGCCACGTTCAATTTAATCTCAC      | 578             | 57      |
|                       | <b>E02</b>     | GGAAGGACCCAGCTGTATTGACC       | CAAGGGCACAGAGAAAGAGGGAAG      | 398             | 59      |
|                       | <b>E03</b>     | CTGGGGGAGGGGAGGAAAAGG         | GGTGAGTGGGGATGCAGATGGGTG      | 536             | 60      |
|                       | <b>E04</b>     | CCTCCCCGAGAGCCGTAGTTGC        | GAGGGCGTTGGAGGTGGGAGGTAG      | 362             | 59      |
|                       | <b>E05</b>     | GGGGTGGGCTGGAGATGGTAG         | GGCGTTTGATCCCAGTTTTAGTG       | 344             | 56      |
|                       | <b>E06</b>     | ATTGCCCTGTGTTTCCCCTATT        | AAATTAAGCGACAAGAAACAGG        | 524             | 53      |
|                       | <b>E07</b>     | GTTGAAGGGGGATGGGAAAGGTG       | TGGCCAGGTGACAGACAGTTAAGC      | 445             | 57      |
|                       | <b>E08</b>     | GCCTAGGCCTGTCTTTCTCTG         | GTTAACAAAATCGCAATCGTGAAT      | 537             | 53      |
|                       | <b>E09</b>     | GGTTCTGCAAGTATCCTAAGTAGCT     | TGAATCAACAAGCCACCAGG          | 420             | 53      |
|                       | <b>E10</b>     | CCAAGTGCATTCATCTTTCCCTC       | GCCAGGCGTTCCTATACTACTCC       | 261             | 56      |
|                       | <b>E11</b>     | AGCCTGCTATGTTCTGTCTCTTTC      | GATCCTGGCTTCCCCTCTG           | 368             | 54      |
|                       | <b>E12</b>     | GTCATCCCCTCATCAACACAG         | TGGGCAAGGAGAACATAAGAA         | 423             | 54      |
|                       | <b>E13.A</b>   | GGAAAATAGTGGCAAAATGTGAGTT     | GGTCCAGAGTAGATGCCAAGAATG      | 584             | 56      |

| Region        | Fragment         | Forward_Primer           | Reverse_Primer          | Amplicon length | Opt. T' |
|---------------|------------------|--------------------------|-------------------------|-----------------|---------|
|               | <b>E13.B</b>     | ATACAGGAGACCCAACAATGAGTG | CCAGGCTAGAAAGAGGGAGAGA  | 573             | 54      |
|               | <b>E13.C</b>     | CTCTCGCCTAGGATTTTCAGCC   | TGCCAACTCATACCAAAGTCTAC | 602             | 53      |
|               | <b>E13.D</b>     | GTCCCATGCAACAACCAC       | GGGGGGCAGTAAACAAATTTTTC | 544             | 53      |
| <b>RT-PCR</b> | <b>meis1_1'F</b> | GATTGGCCGAGCACTCCT       |                         |                 |         |
|               | <b>meis1_1eF</b> | AGGTCCCGTAGACCGAAGAT     |                         |                 |         |
|               | <b>meis1_3R</b>  |                          | ATGACTCTGACGAGCAGACG    |                 |         |
|               | <b>meis1_3'F</b> | TCCAACCTCAGATTTTCTCTCTG  |                         |                 |         |
|               | <b>meis1_6R</b>  |                          | GGCATTTCCTTTCAAACA      |                 |         |
|               | <b>meis1_7F</b>  | ACGGCATCTACTCGTTCAGG     |                         |                 |         |
|               | <b>meis1_10F</b> | AGTGCAGCCCATGATAGACC     |                         |                 |         |
|               | <b>meis1_10R</b> |                          | GGTCTATCATGGGCTGCACT    |                 |         |
|               | <b>meis1_12R</b> |                          | TCATGCCCATTCCTCATA      |                 |         |
|               | <b>meis1_13R</b> |                          | TTGATGCTGACATTGGCATT    |                 |         |

**Supplementary Table S2. Summary of Sequence Variants Detected in Sequencing of *MEIS1* Exons and Flanking Regions**

| Variant    | Classification    | Position | Genomic region | ID            | Variant | Allelewise       |                | Genotypewise                     |             |                |       |
|------------|-------------------|----------|----------------|---------------|---------|------------------|----------------|----------------------------------|-------------|----------------|-------|
|            |                   |          |                |               |         | MAF case/control | <i>P</i> value | Genotype frequency* case/control |             | <i>P</i> value |       |
| <b>v1</b>  | intronic          | 66520690 | intron 3       | rs2271856     | C/T     | 0.384/0.356      | 0.357          | 0.155/0.140                      | 0.457/0.432 | 0.388/0.428    | 0.637 |
| <b>v2</b>  | intronic          | 66522040 | intron 4       | rs41285949    | G/A     | 0.000/0.002      | 0.265          | 0.000/0.004                      | 1.000/0.997 | 0.000/0.000    | 0.265 |
| <b>v3</b>  | intronic, ins/del | 66522148 | intron 5       | novel ins/del | (CA)del | 0.000/0.002      | 0.265          | 0.000/0.004                      | 1.000/0.997 | 0.000/0.000    | 0.265 |
| <b>v4</b>  | intronic          | 66522155 | intron 5       | novel SNP     | A/G     | 0.002/0.002      | 0.915          | 0.004/0.004                      | 0.997/0.997 | 0.000/0.000    | 0.915 |
| <b>v5</b>  | intronic          | 66522155 | intron 5       | novel SNP     | C/G     | 0.002/0.000      | 0.214          | 0.004/0.000                      | 0.997/1.000 | 0.000/0.000    | 0.214 |
| <b>v6</b>  | exonic, syn       | 66544852 | Exon 7         | rs13005707    | A/G     | 0.010/0.011      | 0.954          | 0.020/0.021                      | 0.980/0.980 | 0.000/0.000    | 0.954 |
| <b>v7</b>  | intronic          | 66649410 | intron 11      | novel SNP     | C/T     | 0.053/0.042      | 0.402          | 0.008/0.000                      | 0.090/0.084 | 0.902/0.916    | 0.206 |
| <b>v8</b>  | 3'UTR             | 66651786 | Exon 13        | rs2861108     | T/G     | 0.025/0.016      | 0.360          | 0.053/0.033                      | 0.947/0.968 | 0.000/0.000    | 0.355 |
| <b>v9</b>  | 3'UTR             | 66652131 | Exon 13        | novel SNP     | C/T     | 0.002/0.000      | 0.238          | 0.004/0.000                      | 0.996/1.000 | 0.000/0.000    | 0.237 |
| <b>v10</b> | 3'UTR             | 66652293 | Exon 13        | novel SNP     | G/C     | 0.000/0.004      | 0.114          | 0.000/0.007                      | 1.000/0.993 | 0.000/0.000    | 0.114 |
| <b>v11</b> | 3'UTR             | 66652436 | Exon 13        | novel SNP     | T/A     | 0.002/0.004      | 0.645          | 0.004/0.007                      | 0.996/0.993 | 0.000/0.000    | 0.645 |
| <b>v12</b> | 3'UTR             | 66652634 | Exon 13        | novel SNP     | A/G     | 0.000/0.004      | 0.114          | 0.000/0.007                      | 1.000/0.993 | 0.000/0.000    | 0.114 |
| <b>v13</b> | 3'UTR             | 66652636 | Exon 13        | novel SNP     | A/G     | 0.000/0.002      | 0.264          | 0.000/0.004                      | 1.000/0.997 | 0.000/0.000    | 0.264 |
| <b>v14</b> | 3'UTR             | 66652708 | Exon 13        | novel SNP     | G/T     | 0.002/0.000      | 0.219          | 0.004/0.000                      | 0.996/1.000 | 0.000/0.000    | 0.219 |
| <b>v15</b> | 3'UTR             | 66652752 | Exon 13        | novel SNP     | A/G     | 0.000/0.002      | 0.260          | 0.000/0.004                      | 1.000/0.996 | 0.000/0.000    | 0.260 |
| <b>v16</b> | 3'UTR             | 66652898 | Exon 13        | novel SNP     | G/A     | 0.033/0.038      | 0.656          | 0.000/0.004                      | 0.066/0.076 | 0.934/0.921    | 0.650 |
| <b>v17</b> | 3'UTR             | 66653295 | Exon 13        | novel SNP     | A/G     | 0.002/0.000      | 0.217          | 0.004/0.000                      | 0.996/1.000 | 0.000/0.000    | 0.217 |
| <b>v18</b> | 3'UTR             | 66653332 | Exon 13        | novel SNP     | G/T     | 0.000/0.002      | 0.262          | 0.000/0.004                      | 1.000/0.996 | 0.000/0.000    | 0.262 |
| <b>v19</b> | 3'UTR             | 66653340 | Exon 13        | novel SNP     | A/G     | 0.000/0.004      | 0.113          | 0.000/0.007                      | 1.000/0.993 | 0.000/0.000    | 0.112 |

\* genotype frequency in the order of homozygous minor allele / heterozygous /homozygous major allele; MAF: minor allele frequency

Supplementary Table S3. Marker Information and Case-Control Association Tests

| dbSNP      | Location   | Region     | MAF case | MAF control | Allelic association*                     | Genotypic association*                   |
|------------|------------|------------|----------|-------------|------------------------------------------|------------------------------------------|
| rs6546232  | 66,512,364 | Intergenic | 0.350    | 0.337       | 0.65                                     | 0.90                                     |
| rs13033745 | 66,513,907 | Intergenic | 0.347    | 0.336       | 0.70                                     | 0.93                                     |
| rs11883967 | 66,527,366 | Intron6    | 0.376    | 0.362       | 0.62                                     | 0.70                                     |
| rs6716792  | 66,541,347 | Intron6    | 0.452    | 0.475       | 0.43                                     | 0.40                                     |
| rs11692504 | 66,577,567 | Intron7    | 0.391    | 0.385       | 0.84                                     | 0.87                                     |
| rs4547518  | 66,580,072 | Intron7    | 0.260    | 0.340       | $3.02 \times 10^{-03}$                   | $8.59 \times 10^{-03}$                   |
| rs12373638 | 66,584,746 | Intron7    | 0.491    | 0.447       | 0.13                                     | 0.34                                     |
| rs6721499  | 66,597,095 | Intron8    | 0.297    | 0.375       | $4.76 \times 10^{-03}$                   | <b><math>5.52 \times 10^{-04}</math></b> |
| rs4300815  | 66,600,036 | Intron8    | 0.250    | 0.331       | $2.47 \times 10^{-03}$                   | $4.52 \times 10^{-03}$                   |
| rs4544423  | 66,603,521 | Intron8    | 0.318    | 0.415       | <b><math>6.64 \times 10^{-04}</math></b> | <b><math>7.56 \times 10^{-04}</math></b> |
| rs6742861  | 66,603,656 | Intron8    | 0.235    | 0.285       | 0.07                                     | 0.22                                     |
| rs6728018  | 66,603,769 | Intron8    | 0.237    | 0.287       | 0.07                                     | 0.23                                     |
| C13B_2     | 66,604,068 | Intron8    | 0.190    | 0.081       | <b><math>1.81 \times 10^{-07}</math></b> | <b><math>2.21 \times 10^{-6}</math></b>  |
| rs11688599 | 66,610,054 | Intron8    | 0.251    | 0.329       | $3.88 \times 10^{-03}$                   | $8.84 \times 10^{-03}$                   |
| rs4316931  | 66,614,409 | Intron8    | 0.251    | 0.282       | 0.23                                     | 0.40                                     |
| rs7603236  | 66,615,915 | Intron8    | 0.314    | 0.404       | $1.63 \times 10^{-03}$                   | $2.08 \times 10^{-03}$                   |
| rs12469063 | 66,617,812 | Intron8    | 0.364    | 0.222       | <b><math>8.12 \times 10^{-08}</math></b> | <b><math>1.19 \times 10^{-07}</math></b> |
| rs11681729 | 66,618,204 | Intron8    | 0.241    | 0.209       | 0.23                                     | 0.21                                     |
| rs9789535  | 66,619,082 | Intron8    | 0.396    | 0.445       | 0.09                                     | 0.11                                     |
| rs17625724 | 66,622,479 | Intron8    | 0.237    | 0.290       | 0.04                                     | 0.15                                     |
| rs17625742 | 66,622,658 | Intron8    | 0.232    | 0.294       | 0.02                                     | 0.08                                     |
| rs11678796 | 66,623,539 | Intron8    | 0.253    | 0.335       | $2.43 \times 10^{-03}$                   | $5.68 \times 10^{-03}$                   |
| rs2300478  | 66,634,957 | Intron9    | 0.373    | 0.243       | <b><math>1.37 \times 10^{-06}</math></b> | <b><math>9.41 \times 10^{-06}</math></b> |
| rs2300483  | 66,641,765 | Intron9    | 0.530    | 0.432       | <b><math>7.73 \times 10^{-04}</math></b> | $3.39 \times 10^{-03}$                   |
| rs2300486  | 66,644,908 | Intron9    | 0.292    | 0.287       | 0.84                                     | 0.72                                     |
| rs1000756  | 66,648,338 | Intron10   | 0.305    | 0.357       | 0.06                                     | 0.14                                     |

MAF: minor allele frequency. \* Significant results are highlighted in bold.

**Supplementary Table S4. Clinical Information on the Autopsy Brain Tissues from 28 Individuals with RLS**

| Brain # | Age | Sex | PMI | RLS diagnosis confirmation | Family history | RLS age at onset (years) | RLS progression (years symptoms progressed to daily) | RLS Treatment                                         |
|---------|-----|-----|-----|----------------------------|----------------|--------------------------|------------------------------------------------------|-------------------------------------------------------|
| B4958   | 77  | F   | 11  | RLS                        | no             | 6                        | yes (7)                                              | vicodin                                               |
| B5041   | 76  | F   | 19  | RLS                        | yes            | 10                       | yes                                                  | zanaflex                                              |
| B5065   | 84  | F   | 17  | RLS                        | yes            | 42                       | yes (20-40)                                          | bromocriptine, propoxyphene, iron                     |
| B5164   | 106 | F   | 3   | RLS                        | yes            | 101                      | yes (1)                                              |                                                       |
| B5347   | 53  | F   | 4   | RLS                        | no             | <45                      | yes (3)                                              | carbidopa/levodopa, neurontin                         |
| B5462   | 77  | F   | 20  | RLS                        | yes            | 43                       | yes (15)                                             | carbidopa/levodopa, mirapex, iron, codiene            |
| B5609   | 86  | F   | 17  | RLS                        | no             | 45-50                    | yes (20)                                             | carbidopa/levodopa, permax, percocet, ativan          |
| B5655   | 85  | F   | 15  | RLS                        | unknown        | 20                       | yes                                                  | codeine.                                              |
| B5739   | 52  | M   | 8   | RLS                        | unknown        | unknown                  | unknown                                              |                                                       |
| B5909   | 71  | F   | 19  | RLS                        | unknown        | unknown                  | unknown                                              |                                                       |
| B6032   | 89  | F   | 5   | RLS                        | unknown        | unknown                  | unknown                                              |                                                       |
| B6050   | 76  | F   | 20  | RLS                        | unknown        | unknown                  | unknown                                              |                                                       |
| B6073   | 85  | M   | 24  | RLS                        | unknown        | unknown                  | unknown                                              |                                                       |
| B6084   | 82  | F   | 19  | RLS                        | unknown        | 28                       | yes (15)                                             | carbidopa/levodopa, xanax, effexor, clariton D        |
| B6106   | 75  | F   | 22  | RLS                        | unknown        | unknown                  | unknown                                              |                                                       |
| B6264   | 83  | F   | 27  | RLS                        | yes            | 5                        | yes (15+)                                            | demerol, codeine, klonopin, durgesic patch, neurtonin |
| B6343   | 87  | F   | 22  | RLS                        | yes            | childhood                | yes                                                  | permax                                                |
| B6402   | 87  | M   | 22  | RLS                        | unknown        | 74                       | unknown                                              | mirapex                                               |
| B6410   | 81  | M   | 14  | RLS                        | unknown        | 70                       | no                                                   | oxycodone, gabapentin, clonazepam, iron               |
| B6441   | 83  | F   | 17  | RLS                        | no             | 35                       | yes (45)                                             | carbidopa/levodopa, zanex                             |
| B6490   | 73  | F   | 22  | RLS                        | no             | 35                       | yes (23)                                             | permax, clonazepam                                    |
| B6504   | 90  | M   | 16  | RLS                        | yes            | 20                       | yes (15)                                             | carbidopa/levodopa, permax                            |
| B6607   | 87  | M   | 12  | RLS                        | unknown        | 55                       | yes                                                  | carbidopa/levodopa, mirapex, iron                     |
| B6619   | 77  | M   | 14  | RLS                        | yes            | 50                       | no                                                   |                                                       |
| B6644   | 91  | F   | 9   | RLS                        | yes            | 40                       | yes                                                  | carbidopa/levodopa, vit E                             |
| B6719   | 78  | F   | 13  | RLS                        | yes            | childhood                | yes                                                  | ultram, ambien, vicodin, hydrocodone, neurontin       |
| B6772   | 88  | F   | 15  | RLS                        | unknown        | 35                       | yes                                                  | iron, clonazepam                                      |
| B6945   | 93  | F   | 20  | RLS                        | yes            | 14                       | yes                                                  | valium, carbidopa/levodopa                            |

PMI: post-mortem interval.



**Supplementary Table S5. Clinical and Demographic Information on RLS Patients and Controls**

|                                  |                                         |
|----------------------------------|-----------------------------------------|
| <b>RLS Cases</b>                 | <b>285</b>                              |
| Female:male ratio                | 1.7 (178/107)                           |
| Age (years, mean $\pm$ SD)       | 54 $\pm$ 12                             |
| Age of onset (yr, mean $\pm$ SD) | 30 $\pm$ 16                             |
| Severity score                   | 26 $\pm$ 11 (IRLSS <sup>a</sup> )       |
| Daily or nearly daily symptoms   | 82%                                     |
| Familial cases                   | 78%                                     |
| Ferritin ( $\mu$ g/l)            | Female: 72 $\pm$ 51, Male:143 $\pm$ 101 |
| PLMS positive <sup>b</sup>       | 82%                                     |
| <b>Controls</b>                  | <b>285</b>                              |
| Female:male                      | 1.3 (162/123)                           |
| Age (yr, mean $\pm$ SD)          | 42 $\pm$ 13                             |

<sup>a</sup> The International RLS Study Group severity scale (SS) contains 10 items with a range of 0 – 4 score/each. SS: 0 – 10, mild; 11 – 20, moderate; 21 – 30, severe; 31 – 40, very severe; <sup>b</sup> The PLMS measurements were performed by one-night polysomnography (PSG) prior to treatment or with reduced dopaminergic medications. The PLMS index > 5.0/hr was classified as positive according to the standard.

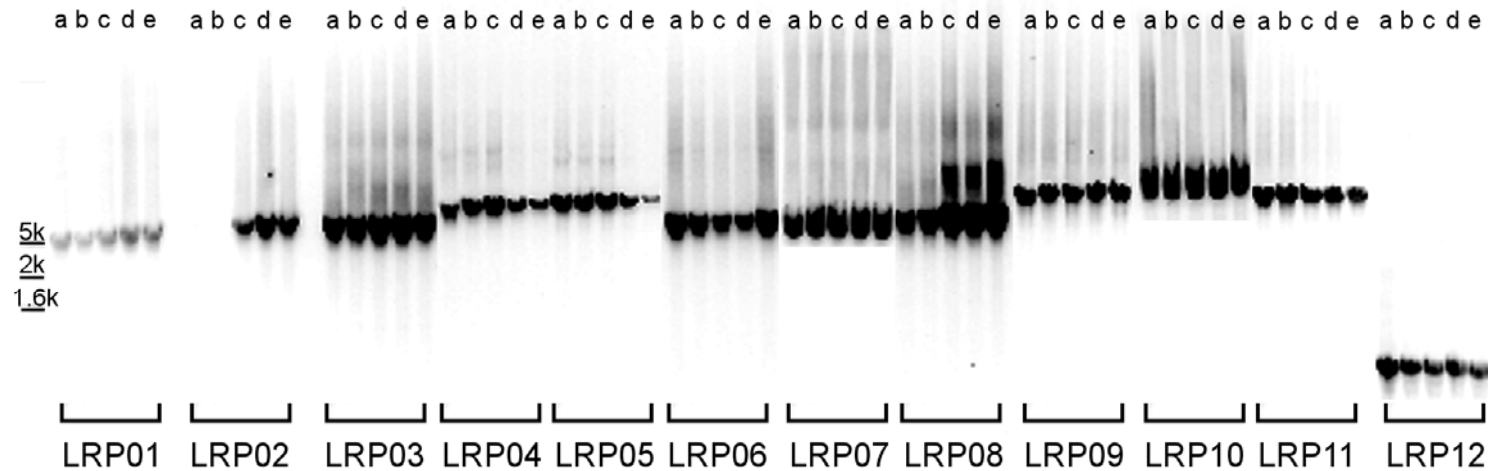

**Supplementary Figure S1: Long range PCR results.** The PCR products were electrophoresed on a 0.9% agarose gel (UltraPure, Invitrogen) for 4 hours. Lambda DNA/Hind III Fragment (Invitrogen) was used as the molecular weight standard. Lane a,b,d were samples from RLS patients homozygous for the risk associated haplotype (GG/GG); lane c,e were samples from two non-RLS controls homozygous for haplotype (AA/TT). Fragments were run on three different gels based on different size range and images were assembled according to the ladders. LRP02 was repeated and two failed samples (lane a, b) were reamplified and showed no difference.

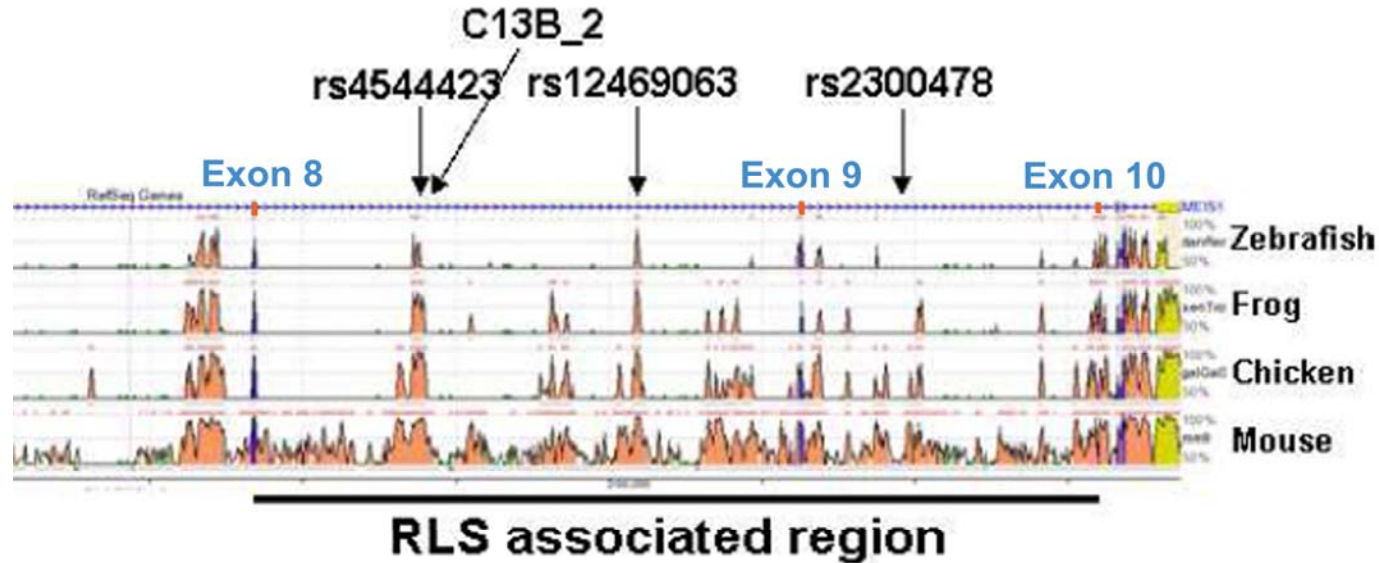

**Supplementary Figure S2. A Schematic Showing of Comparative Genomic Analysis of the MEIS1 Gene Using the ECR Browser\*.** Pairwise comparisons of the human sequence with mouse, chicken, frog, and zebrafish are shown from the bottom to the top respectively. Blue peaks represent significantly evolutionary conserved exons, and peach colored peaks represent significantly evolutionary conserved intronic noncoding sequences. Black arrows point to the location of the RLS associated SNPs.  
 \* Ref: Loots, G. and Ovcharenko, I. (2007) ECRbase: database of evolutionary conserved regions, promoters, and transcription factor binding sites in vertebrate genomes. *Bioinformatics*, 23, 122-124. Epub 2006 Nov 7.

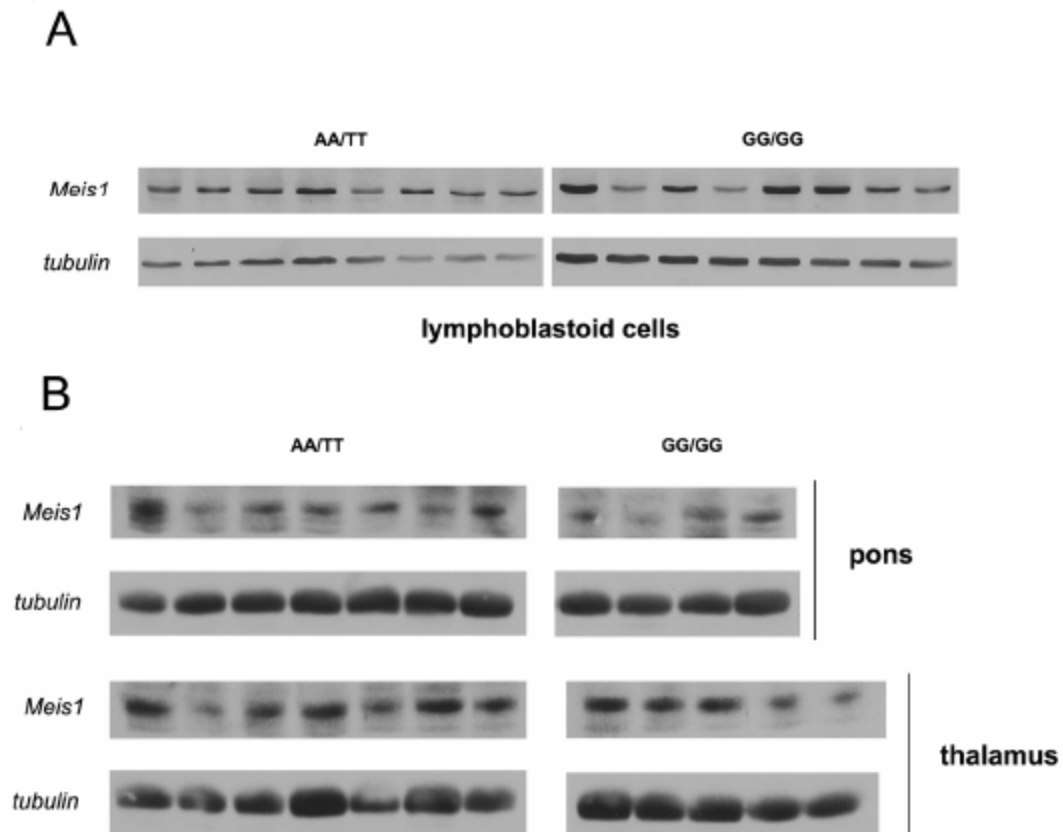

**Supplementary Figure S3: Western blot of MEIS1 in RLS lymphoblastoid cell lines and brain tissues.** (A) Western blotting experiments illustrate significant changes in expression levels of MEIS1 in lymphoblastoid cell samples carrying the AA/TT genotype, compared with samples carrying the RLS-associated genotype GG/GG. (B) Western blotting experiments illustrate changes in expression levels of MEIS1 in both thalamus and pons tissue samples of RLS patients carrying the AA/TT genotype, compared with RLS patients carrying the RLS-related genotype GG/GG.

**Method:**

**Protein extraction:** Protein lysates from human thalamus, pons, and lymphoblastoid cells were homogenized in SUB lysis buffer (0.5% SDS, 8M Urea, 2%  $\beta$ -mercaptoethanol), centrifuged 20 min/13,000 rpm at 4 °C. The soluble fractions were quantified and diluted in loading buffer. Protein lysates were prepared three separate times.
